# Supplementary material for: Renal cell tumors convert natural killer cells to a proangiogenic phenotype
Source: PubMed Central journal article supplement (PMC7335666; doi:10.18632/oncotarget.27654), 2020-06-30
Supplement: oncotarget-11-2571-s001.pdf [file oncotarget-11-2571-s001.pdf]

# Renal cell tumors convert natural killer cells to a proangiogenic phenotype

## SUPPLEMENTARY MATERIALS

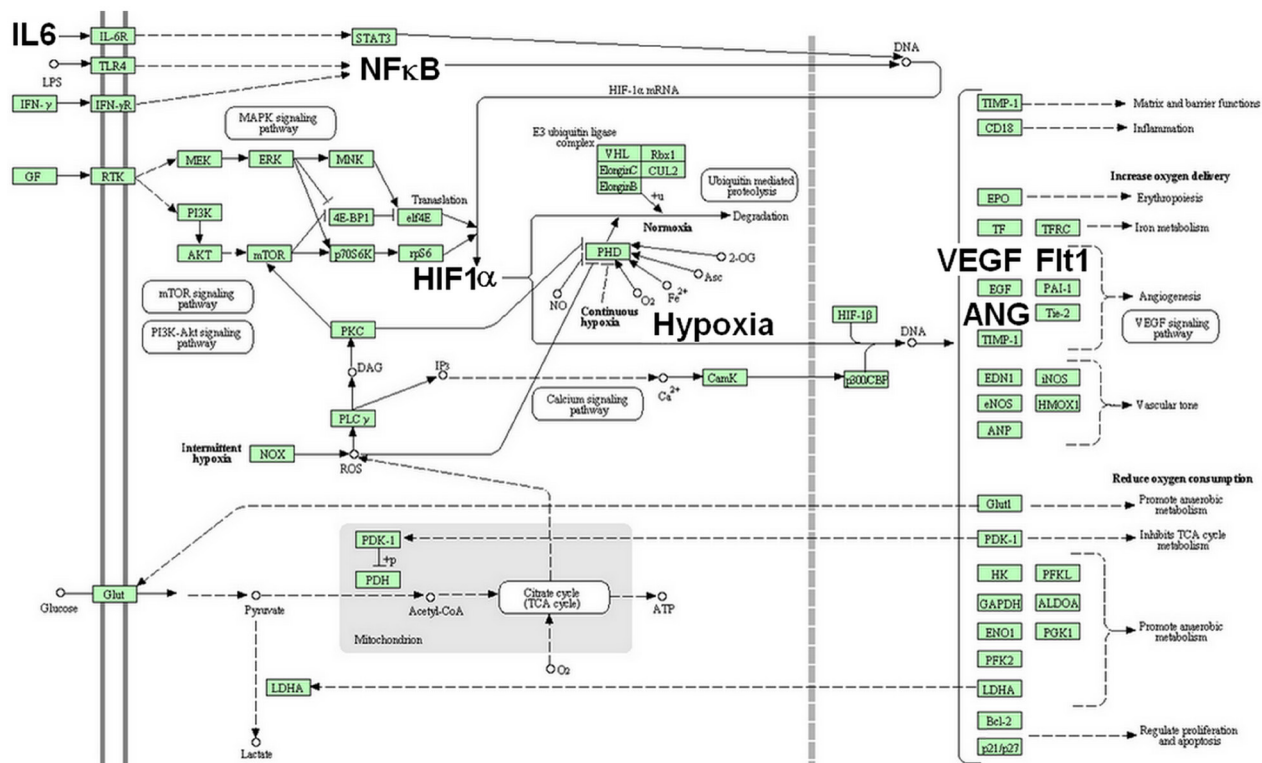

**Supplementary Figure 1: HIF1 $\alpha$  signaling pathway.** Schematic diagram of the HIF1 $\alpha$  signaling pathway with genes and characteristics of direct significance to conversion of pNK to dNK-like cells in the tumor microenvironment highlighted in bold.

**Supplementary Table 1: Phenotype of patient-matched pNK and TiNK cells used for gene expression studies**

|       | Peripheral Blood (pNK)                      |                        | RCC Tumor (TiNK)                            |                        |
|-------|---------------------------------------------|------------------------|---------------------------------------------|------------------------|
|       | CD56 <sup>+</sup> CD16 <sup>dim/neg</sup> # | VEGF mRNA <sup>†</sup> | CD56 <sup>+</sup> CD16 <sup>dim/neg</sup> # | VEGF mRNA <sup>†</sup> |
|       | (%)                                         | (% $\beta$ -actin)     | (%)                                         | (% $\beta$ -actin)     |
| Pt. 1 | 20                                          | 0.294                  | 89                                          | 8.379                  |
| Pt. 2 | 11                                          | 0.035                  | 51                                          | 3.359                  |
| Pt. 3 | 4                                           | 0.076                  | 19                                          | 0.645                  |
| Pt. 4 | 8                                           | 0.039                  | 61                                          | 2.017                  |

#Determined by multi-color flow cytometry and reported as percentage of total CD56<sup>+</sup> population.

†Determined by RT-qPCR and reported as percentage of  $\beta$ -actin internal control.

**Supplementary Table 2: Transcript levels in NK cells isolated from peripheral blood (pNK) or tumor tissue (TiNK) of patients with renal cancer. See Supplementary Table 2**

**Supplementary Table 3: Gene expression results for RCC NK cells versus dNK cells. See Supplementary Table 3**
